# Supplementary material for: New methods for the retrieval of chlorophyll red fluorescence from hyperspectral satellite instruments: simulations andapplication to GOME-2 and SCIAMACHY
Source: Copernicus journal article supplement (doi:10.5194/amt-9-3939-2016), 2016-08-23
Supplement: Supplementary file 1 [file amt-9-3939-2016-supplement.pdf]

Supplement of Atmos. Meas. Tech., 9, 3939–3967, 2016  
<http://www.atmos-meas-tech.net/9/3939/2016/>  
doi:10.5194/amt-9-3939-2016-supplement  
© Author(s) 2016. CC Attribution 3.0 License.

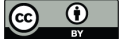

*Supplement of*

## **New methods for the retrieval of chlorophyll red fluorescence from hyperspectral satellite instruments: simulations and application to GOME-2 and SCIAMACHY**

**Joanna Joiner et al.**

*Correspondence to:* Joanna Joiner ([joanna.joiner@nasa.gov](mailto:joanna.joiner@nasa.gov))

The copyright of individual parts of the supplement might differ from the CC-BY 3.0 licence.

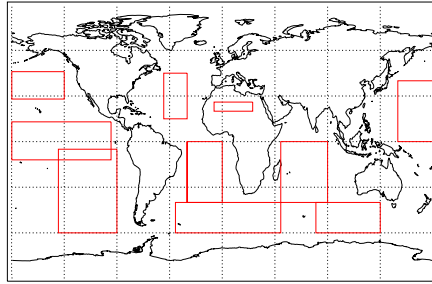

**Figure S1.** Regional boxes used for principal component analyses (PCA).

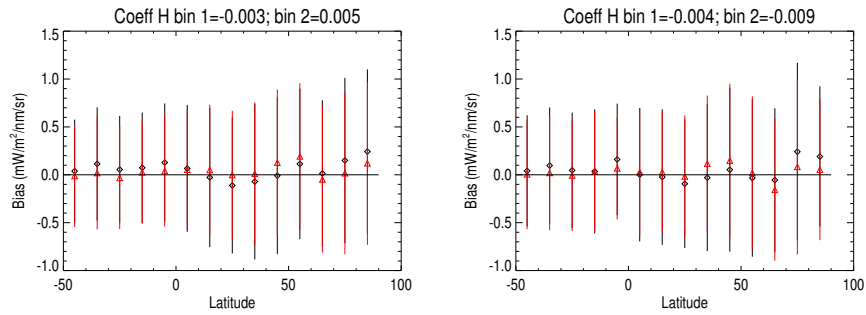

(a) SCIAMACHY biases over ocean (black with diamonds: before bias adjustment; red with triangles: after adjustment) for solar line retrievals for July 15 (left) and July 31 (right) 2007. Symbols denote mean bias and error bars are the standard deviations. Bins 1 and 2 refer to latitude bins between 0-90N and 0-90S, respectively.

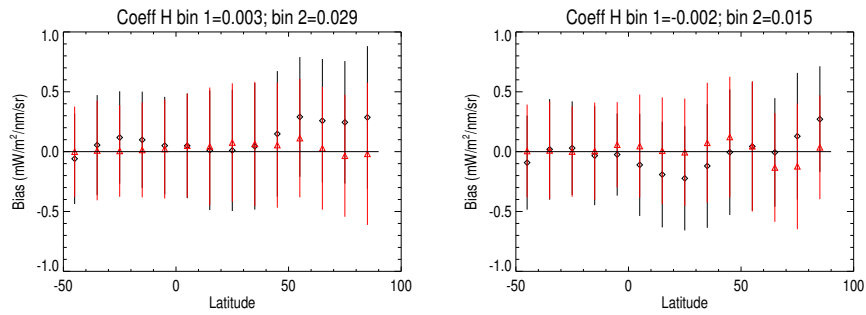

(b) Similar to (a) but for SCIAMACHY O<sub>2</sub> band retrievals.

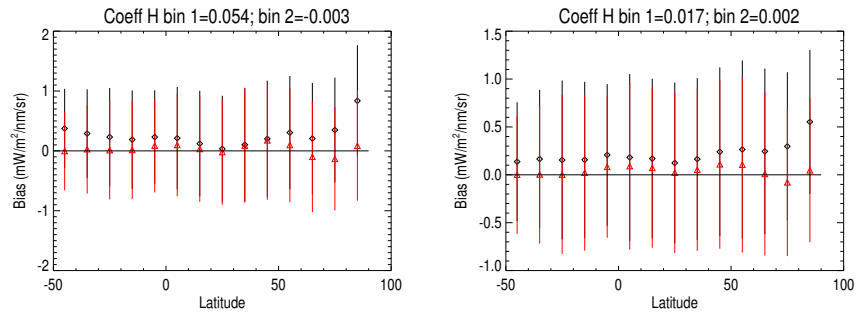

(c) Similar to (b) but for GOME-2. Bins 1-3 refer to latitude bins between 40-90N (bin 1), 40S-40N (bin 2), and 40S-90S (bin 3).

**Figure S2.** SCIAMACHY (upper two panels) and GOME-2 (lower panel) biases over ocean as a function of latitude before (black) and after (red) zero-level adjustment for July 15 (left) and July 31 (right) 2007.

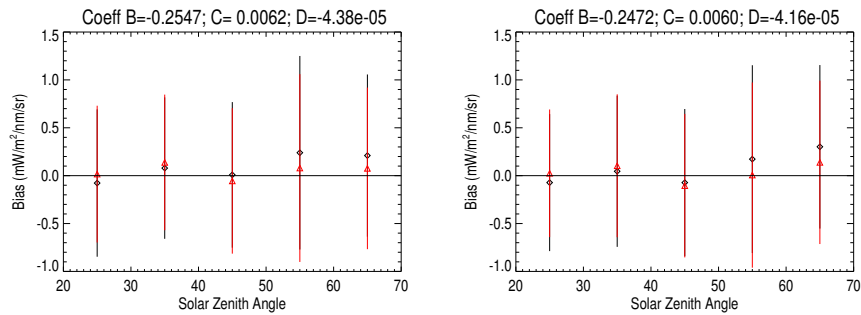

(a) SCIAMACHY solar line retrieval biases over ocean (black with diamonds: before bias adjustment; red with triangles: after adjustment) for latitude bin 1 (0–90N) for July 15 (left) and July 31 (right) 2007. Symbols denote mean biases and error bars are the standard deviations.

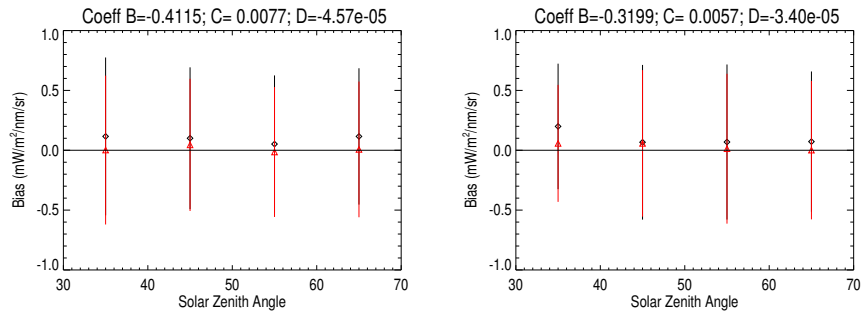

(b) Similar to (a) but for latitude bin 2 (0–90S).

**Figure S3.** SCIAMACHY solar line retrieval biases over ocean as a function of solar zenith angle before (black) and after (red) zero-level adjustment for July 15 (left) and July 31 (right) 2007 and two latitude bins (top and bottom).

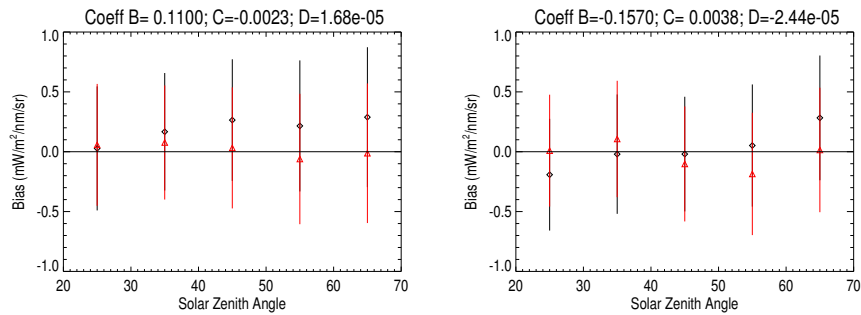

(a) SCIAMACHY  $\text{O}_2$  band retrieval biases over ocean (black with diamonds: before bias adjustment; red with triangles: after adjustment) for latitude bin 1 (0–90N) for July 15 (left) and July 31 (right) 2007. Symbols denote mean biases and error bars are the standard deviations.

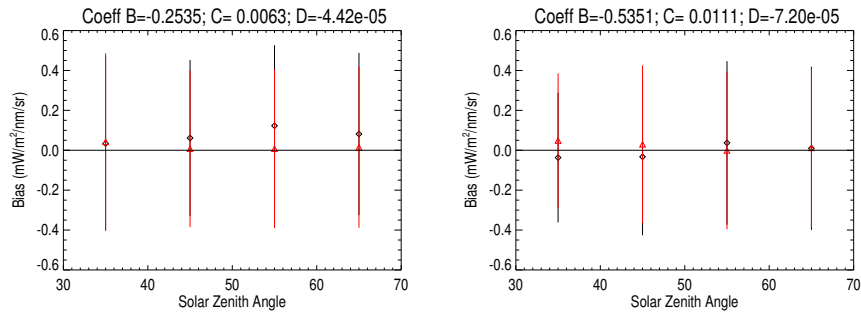

(b) Similar to (a) but for latitude bin 2 (0–90S).

**Figure S4.** SCIAMACHY  $\text{O}_2$  band retrieval biases over ocean as a function of solar zenith angle before (black) and after (red) zero-level adjustment for July 15 (left) and July 31 (right) 2007 and two latitude bins (top and bottom).

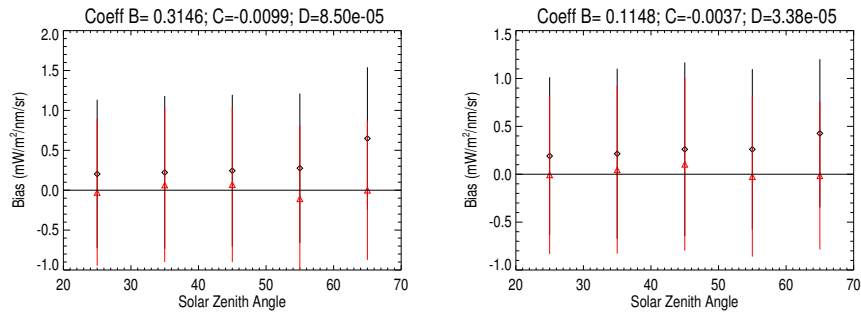

(a) GOME-2 O<sub>2</sub> band retrieval biases over ocean (black with diamonds: before bias adjustment; red with triangles: after adjustment) for latitude bin 1 (40N-90N) for July 15 (left) and July 31 (right) 2007. Symbols denote mean biases and error bars are the standard deviations.

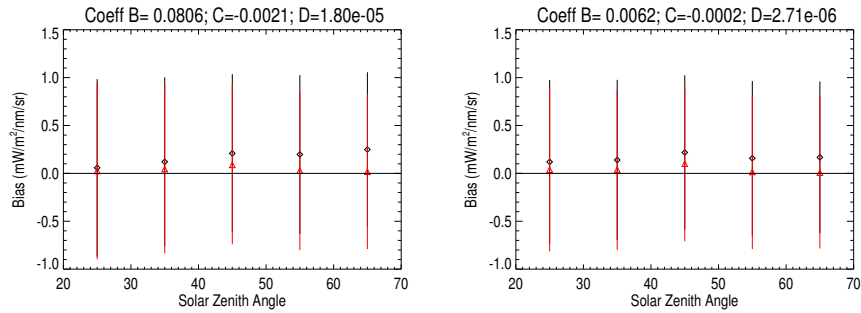

(b) Similar to (a) but for latitude bin 2 (40S-40N).

**Figure S5.** GOME-2 biases over ocean as a function of solar zenith angle (SZA) before (black) and after (red) zero-level adjustment for July 15 (left) and July 31 (right) 2007 and two latitude bins (top and bottom). The third latitude bin for GOME-2 is not shown because it contains only high SZAs.

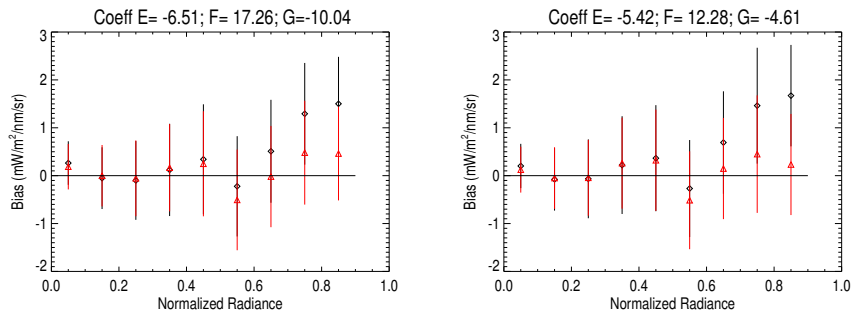

(a) SCIAMACHY solar line retrieval biases over ocean (black with diamonds: before bias adjustment; red with triangles: after adjustment) for latitude bin 1 (40N-90N) for July 15 (left) and July 31 (right) 2007. Symbols denote mean biases and error bars are the standard deviations.

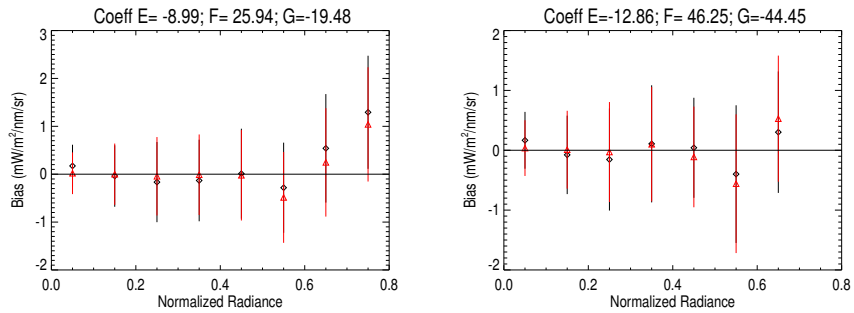

(b) Similar to (a) but for latitude bin 2 (40S-40N).

**Figure S6.** SCIAMACHY solar line retrieval biases over ocean as a function of radiance (normalized, arbitrary units) before (black) and after (red) zero-level adjustment for July 15 (left) and July 31 (right) 2007 and two latitude bins (top and bottom).

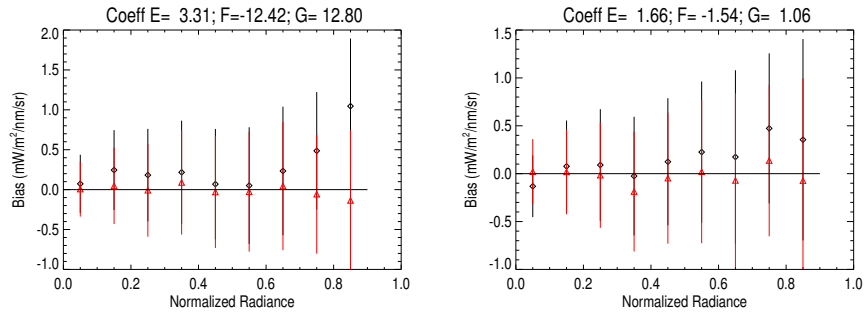

(a) SCIAMACHY  $O_2$  band retrieval biases over ocean (black with diamonds: before bias adjustment; red with triangles: after adjustment) for latitude bin 1 (40N-90N) for July 15 (left) and July 31 (right) 2007. Symbols denote mean biases and error bars are the standard deviations.

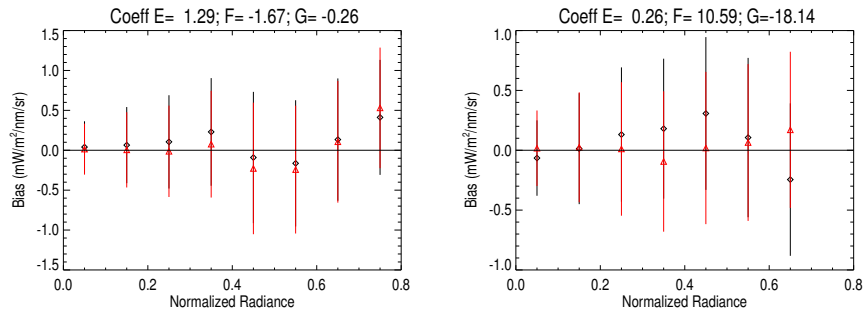

(b) Similar to (a) but for latitude bin 2 (40S-40N).

**Figure S7.** SCIAMACHY  $O_2$  band retrieval biases over ocean as a function of radiance (normalized, arbitrary units) before (black) and after (red) zero-level adjustment for July 15 (left) and July 31 (right) 2007 and two latitude bins (top and bottom).



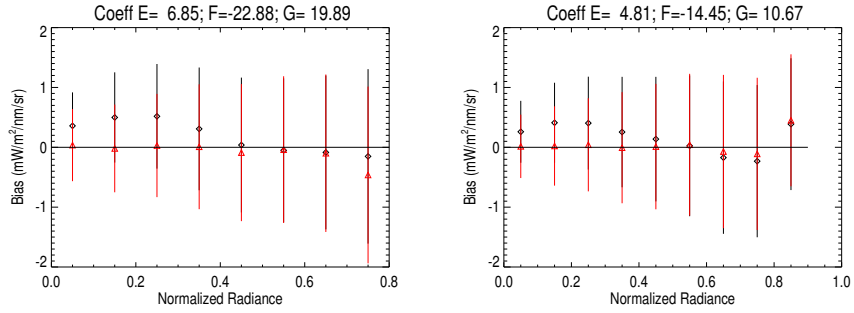

(a) GOME-2 O<sub>2</sub> band retrieval biases over ocean (black with diamonds: before bias adjustment; red with triangles: after adjustment) for latitude bin 1 (40N-90N) for July 15 (left) and July 31 (right) 2007. Symbols denote mean biases and error bars are the standard deviations.

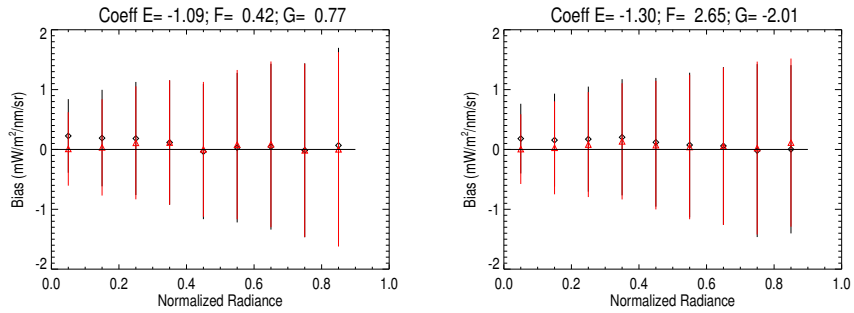

(b) Similar to (a) but for latitude bin 2 (40S-40N).

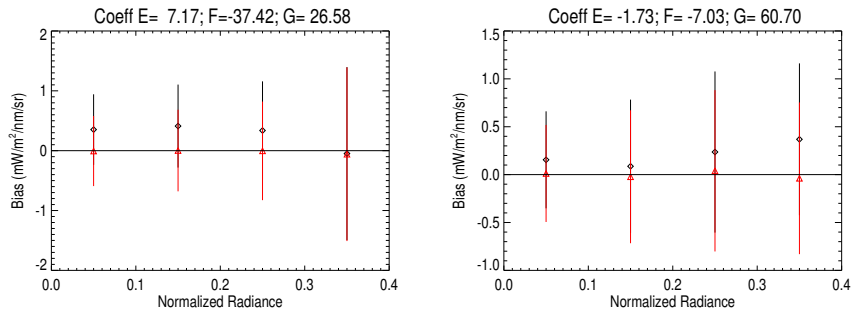

(c) Similar to (b) but for latitude bin 3 (40S-90S).

**Figure S8.** GOME-2 O<sub>2</sub> band retrieval biases over ocean as a function of radiance (normalized, arbitrary units) before (black) and after (red) zero-level adjustment for July 15 (left) and July 31 (right) 2007 and three latitude bins (top, middle, and bottom).

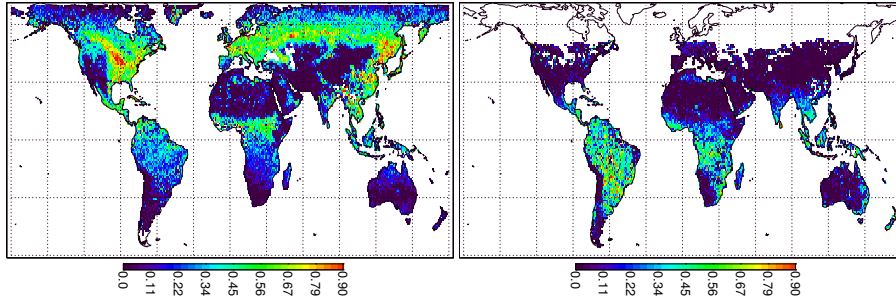

(a) SCIAMACHY retrievals using fitting window 682-686.6 nm

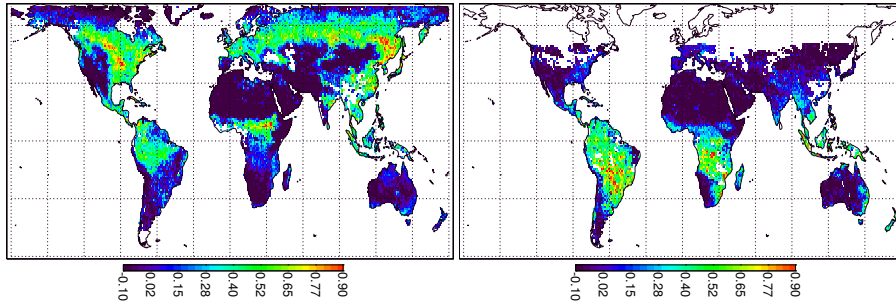

(b) Similar to (a) but using fitting windows in  $O_2$   $\gamma$ - and B-bands.

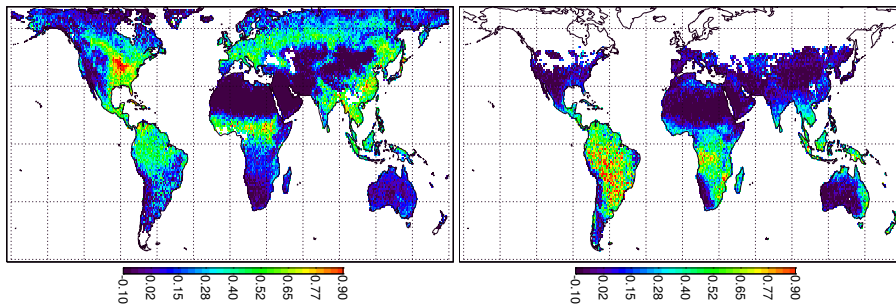

(c) Similar to (b) but using GOME-2.

**Figure S9.** Global composites of red SIF from SCIAMACHY and GOME-2 binned in  $1^\circ$  cell boxes with zero-level adjustment for July (left) and December (right) 2007.

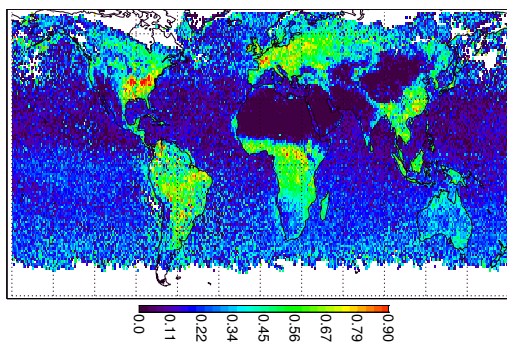

(a) GOME-2 uncorrected O<sub>2</sub> band red SIF retrievals.

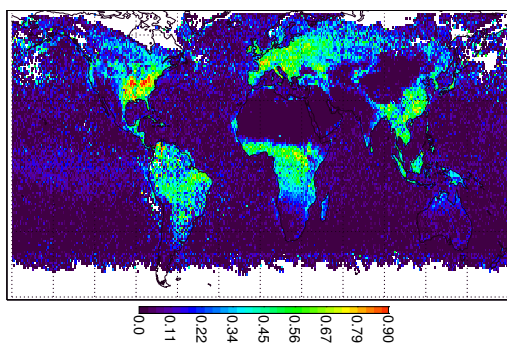

(b) GOME-2 corrected O<sub>2</sub> band red SIF retrievals.

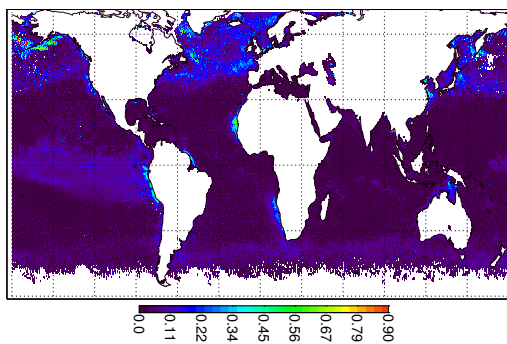

(c) GOME-2 full band ocean FLH retrieval (no correction).

**Figure S10.** Monthly mean fluorescence from different retrievals with and without corrections as noted in  $\text{mW/m}^2/\text{sr/nm}$  for May 2007 gridded to spatial resolutions of  $0.5^\circ$  in (c) and  $1^\circ$  resolution in (a) and (b).
